# Supplementary material
Source: Springer Nature journal article supplement (https://www.springermedizin.de/resource/supplementary/12911_2013_829_MOESM2_ESM.pdf/9526742)
Supplement: MOESM2 [file 9526742]

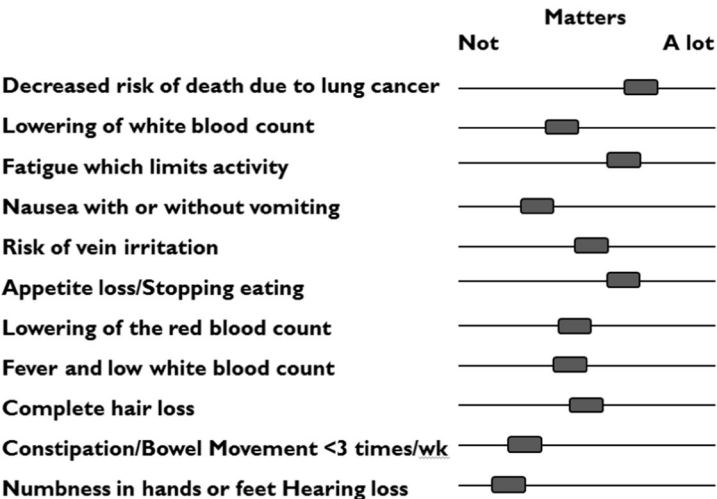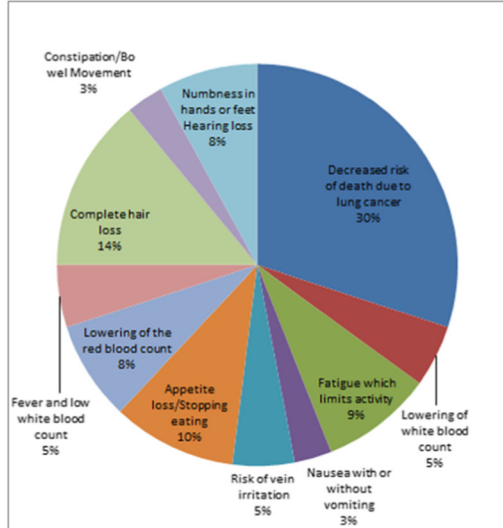

*In this task, information on the range of outcomes for each attribute is first described. The sliders for all attributes begin in the middle. Users can move each slider to indicate its importance. The other sliders do not move, but the area in the pie chart indicates its relative importance. The key feature is that it helps people understand that indicating all attributes 'matter a lot' infers they have equal relative value.*
